# Supplementary material for: Japanese knotweed (Fallopia japonica): an analysis of capacity to cause structural damage (compared to other plants) and typical rhizome extension
Source: PeerJ. 2018 Jul 25;6:e5246. doi: 10.7717/peerj.5246 (PMC6064201; doi:10.7717/peerj.5246)
Supplement: Supplemental Information 1 — Tab. 1: PCA member rhizome extent survey responses. Tab. 2: PCA member structural damage survey responses. Tab. 3: RICS member structural damage survey responses. [file peerj-06-5246-s001.xlsx]

## Sheet: PCA rhizome extent responses
Respondent	Date of occurance	Reason for exclusion	Area	What area did the above Japanese knotweed cover?	What area of soil was excavated?	What was the deepest point of the excavation?	Horizontal measurement analysed	How far did rhizome extend outwards from above ground plants?	Vertical measurement analysed	How far did rhizome extend downwards from above ground plants?	Please describe the Japanese Knotweed stand and the site.
	Date			Open-Ended Response	Open-Ended Response	Open-Ended Response		Open-Ended Response		Open-Ended Response	Open-Ended Response
1	2016-01-11		200	200m2	112m2	2metres	1.5	1.5metres	2	2metres	Mature knotweed stand. It had been at the site for approx. 40 years at least. The site was a field being developed by a housing company. An access road went through the JK area and it had to be excavated and removed to a landscaped area of the site.
2	2016-01-10		0.1	0.1m2	1m2	1m	0	n/a	1	1m	an area of jk we had excavated in 2015 and installed a root barrier membrane. further works on site required the repair of the membrane and removing some loose material that could have contained some jk.
2	2015-11-01		5	5m2	25m3	1m - due to the considerable footings of a large retaining wall	1.5	1.5m	1	1m - to the considerable footings of a large retaining wall	jk growing on the bank near the retaining wall of the bank. which stopped teh jk growing any deeper.
2	2015-09-01		100	100	vb	1m- as the jk was in sealed concrete containers for raised beds. The imported soil for the jk beds was contaminated with jk, and had to be removed.	0	n/a - as contained within concrete beds	0	n/a - as contained within concrete beds	The jk was in sealed concrete containers for raised beds. The imported soil for the jk beds was contaminated with jk, and had to be removed.
2	2016-05-01		4	4m2	16m3	1.9m	0.5	0.5m	1.8	1.8m	jk growing in vegetation on a road verge. had to be hand excavted due to nearby services, that restricted the jk to certain areas. also could not excavate beneath the road, so a root barrier membrane was used against the edge of the excavation
2	2014-12-01		36	36m2	36m3	95m3	1.5	1.5m	2.1	2.1m	jk growing in a residnetial garden, alongside and beneath a swimming pool.
3	2016-04-07		20	20 sqm	50 sqm	2m	3	3m	1	1m	mature and 3m tall
3	2016-02-02		20	20sqm	16 cubes	2m	0.5	0.5m	2	2m	front garden in a London property. had been treated so the growth was small. the jkw had penetrated a boundary wall
3	2015-12-12		50	50sqm	200 cubes	1.8m	2	2m	2	2m	had been treated over 2 years. little jkw growth but lots of rhyzomes
3	2015-11-01		10	10sqm	20 cubes	1.5m	1	1m	1	1m	strong mature growth along a foundation line
3	2016-04-01		10	10 sq m	10 sq m	20 cubes	1	1m	1	1m	mature growth
5	2016-03-01		0.25	.25m2	4m	for the jkw 400mm as below was 300mm plus tared floor which was not penetrated	0.75	.75m	0.4	till they hit the floor	It was an old industrial site, the JKW was situated at the boundary on detritus that had collected on the old floor and had 2 years of treatment.
6	2015-06-12		9	9 square metres	150 cubic metres	2 metres	2.5	2.5 metres	1.8	1.8 metres	Small (3m x 3m), free standing patch of Japanese knotweed approximately 10 years old. Growing amongst long native grasses and some brambles. Located on a small piece of land adjacent to a residential area.
7	2016-03-14		25	25m2 (capped with old tarmac cover)	110m2	1.8m (but critically I suspect that when the tarmac was put in, at least 0.3-0.5m was removed...)	4	4m max, average 3m	1.7	1.6m average, 1.7m maximum	Japanese knotweed located under tarmac (old) on a brownfield site. The JK has basically been partly removed and covered by tarmac, perhaps 15-20 years previously. Sporadic regrowth was occurring, but the true extent of the stand could only be determined by excavation.
7	2015-12-03		12	12m2	30m2	2.7m	0.8	0.8m	2.6	2.6m	Japanese knotweed. Single stand (mature) growing on sandy soil in what used to be a large rear garden, being redeveloped.
7	2015-09-03		12	12m2	30m2	2.2m	1.8	1.8m	2	2m	JK growing in corner of site. Some scraping of surface had taken place (perhaps 5cm) before our involvement with the site.
7	2015-08-11	Disturbed site	791	791m2	1347m2	3.2m	1.6	average 1.6m	3	average 2.4m, max 3m.	Japanese knotweed growing on a very large construction site. Sandy soil. Parts of this were on an old landfill site (deepest rhizomes). This material was retained on site on a cell burial. Some disturbance had taken place on site, prior to our involvement.
7	2015-07-08		9	9m2	? 9m2	15m2	2	2m	2	2m	JK on Network Rail land. Sandwiched between retaining wall and kerb edges (very well constructed!). No damage to either. Excavated to allow signalling works to proceed.
8	2016-02-01		2	Approx 2m	approx 2m x 1m	1m	1.5	approx 1.5m	0.8	approx 800mm	rear garden of a mid terrace victorian house, looks like the previous owner planted it because it looked pretty! Knotweed had spread into adjoining property
9	2016-02-08		50	50sq m	55 sq m	1m	1.5	Maximum extent was 1.5m	0.9	Maximum was 90 cm	Long established stand of probably 20 yrs. Had been previously subject to herbicide treatment for at least two years but developer needed to have removed in order to use the area concerned.
9	2015-06-15		1	Spread out as individual plants over a 5 acre area.	Less than 1 cubic metre	40 cm	0.2	less than 20 cm	0.3	30 cm	Immature individual plants probably no more than three or four years oldest, majority were less than two seasons old.
9	2015-05-20		30	30 sq m	30 sq m	1.3 m	1.8	1.8m	1.2	1m to 1.2m	Long established plants.
10	2016-03-23		110	110m2	140m2	1.5m (high water table)	1	1m	1.3	1.3 m. average very fertile soils	On an area of a construction site. appears that the JKW was flytipped and had colonised the area
11	2016-03-05	Partial excavation		lawn of rear garden	10m2	1m	2	2m	1	1m +	The knotweed had been covered up by landscapers about 10 years ago. Partial excavation with root barrier install was completed to limit the potential for future regrowth. Sandy spoil over heavy clay
11	2015-10-10		34	34m2	120	2	2	2	2	2	residential site with knotweed on boundary. Being redeveloped for flats. Full excavation completed on subject property and neighbouring property to comply with party wall agreement. mature and topsoil over london clay
11	2015-10-07		10	10	45	2	2	2	2	2	knotweed in rear garden against freestanding wall, orginally screened by other shrubs and the wall. Hand been allowed to develop into a mature stand. sandy soil
11	2015-09-20		2	2	10	1	1	1	2	2	knotweed rhizome found, not much active top growth so excavation completed on a remeasure basis. Knotweed circa 10-15 years old on sandy soil
11	2015-05-10		225	225	225	400	4	3-4m	2	2	very established untreated and densely packed stand in topsoil over london clay. adjacent structures also limited the spread in several directions while in other areas sporadic above ground growth was found resulting in precautionary excavation of additional soil
12	2014-04-11		8	4m x 2m x 2m deep, area was a bricked in shrub bed	16m square	2m	1.5	1.5m	1.8	1,8m	Knotweed was growing in a rectangle shrub bed with bricks on all sides, all soils and brickwork removed in covered skips to landfill , 5 year monitoring programme in place.
12	2014-10-14		180	180m square	400m square	2m	1.6	1.6m	1.8	1.8m	Small areas growing on a development site, all areas excavated and screened before burial in an enclosed cell with a 4m bund on top.
13	2016-03-03		0.5	0.5 sq m	1.5 sq m	1 metre	0.75	0.75 metres	0.75	0.75 metres	One single crown, in a flower bed, with approx 6 stems measuring 10mm in diameter
13	2015-11-10		2	2 sq m	4m x 4m	1.5 m	0.25	0.25 metres	1.5	1.5 metres	Number of large crowns, stems up to 30mm in diameter, in a shrub bed
13	2016-11-05		3	Several square metres, scatered plants	10 sq m	300mm	0	no extension	0.15	150mm	Many very small scattered plants none more than 150mm high, each attached to a small fragment of rhizome
13	2015-08-10	Multiple stands	550	550 sq m	Approx 650 sq m	2.5 metres	1	1 metre	2.5	2-2.5 metre	Several large stands stems up to 300mm diameter, site was former storage yard
13	2015-07-22		10	10 sq m	10 sq m	15 sq m	0	No extension	1	1 metre	A number of small stands on a grass bank to the rear of former hotel.
14	2016-01-16		120	20m x 6m	26m x 10m	2.2m	2.5	The entire area contained intertwined rhizomes, the outer edges extended to 2.5m	1.5	1.5m, it had a slight gradient which is why we were down to over 2m below ground level	Council depot, working area fenced off and signs put up all along, all council employees were notified of the works so stayed out if our area. The knotweed was on a slight banking, we excavated all knotweed materials, all soils were stockpiled directly behind the excavation. The soils were removed in 8 wheel tipper wagons, covered, to a registered landfill. We jet washed the excavator and sent th…
14	2015-05-15		24	24m square	48m square	1,2m	1.1	Just over 1m	0.9	Just under 1m	Site was on a hillside, loose soil on top of bedrock. Excavated all soils down to bedrock and scraped entire area. All soils removed from site in covered skips. Root barrier membrane fitted against the east side of the site as it's open spare ground.
14	2015-04-12		8	8m square	It was a shrub bed, bricks on all sides, we excavated the inside to a depth of 1.8m	1.8m	2	No more than 2 m	1.6	1.6m	Shrub bed, bricks on all sides, all interior soil excavated, hand dig find at certain points, loading into covered skips for extraction to landfill. Sides of the shrub bed (bricks) all removed and placed in the skips. Entire area scraped to hard standing and all materials removed.
14	2014-10-11		160	160m square	400m square	1,8m	2	2m	1.7	1.7m	Small areas dotted on development land, all areas excavated to the extent of the root system, further excavations took place and all soils checked and removed. Soils buried onsite, sides of Cell lined with C3 root barrier, once all soils were in the cell, the membrane was pulled over and heat welded. 1m of clean fill was placed on too to bring up to ground level, and a. 4m bund of clean fill was …
15	2016-03-04	Multiple stands	450	450 sq/m	800 sq/m	2m	10	10m	2	2m	1 very large and mature clump and 6 smaller clumps
15	2016-02-23	Disturbed site	8	8sq/m	10 sq/m	2.5m	12	12m	2.5	2.5m	1 clumps on garden boundary
15	2016-02-08		25	25sq/m	30sq/m	1.5m	2	2m	1.5	1.5m	Large clump growing in drain and hedge line
15	2016-02-08		12	12sq/m	20sq/m	1m	5	5m	1	1m	Small clump growing next to stream
15	2016-02-08		8	8sq/m	8sqm	12 sq/m	0	none visible	1.5	1.5m	clump growing along garden wall very old wall
16	2015-12-03		80	80m2	5m2	2.3m	1	1m	0.8	0.8m	The JK was growing off site but immediately adjacent to the boundary. It had been treated professionally (non-PCA member) for a number of years. Our role was to supervise the installation of a new sewer inside the property boundary.
16	2015-10-13		0.5	0.5m2 - just a single clump of crown material was visible	25m2	1.6m	1.5	1.5m	1.5	1.5m	A small stand on a boundary of 2 residential properties and a sports and social club. Residential property had been mis-represented at sale. Social club had tarmacced over the JK in the past (probably 10 years although deny all knowledge). Annual treatment by social club had suppressed spread
16	2015-08-26		15	15m2 total stand. very sparse inside stand	10m2. Area of JK crown material excavated in client property approx 0.5m2	0.9m	2	2m	0.7	0.7m	JK had encroached into the rear of a residential garden from a neighbouring residential property (housing association). Only the client property was excavated and a RBM installed to prevent re-occurrence. Client property ground conditions very hard across main part of excavation - had prevented rhizome depth but encouraged horizontal spread. Mis-represented at sale. work paid for by surveyors.
16	2015-05-05	Disturbed site	600	600m2	800m2. Rhizome had extended below adjacent paving	3.5m. NB. This was a special case - the JK had come from contaminated back fill on a bank. It was still the deepest free growing rhizome I have encountered and effective depth was probably equivalent to 2.5m	2.5	2.5m. Channeled by ground conditions - along an interface of a foundation and a concrete slab	3.2	3.2m	A large commercial excavation adjacent to a main road. JK rhizomes remain under services and the road. the JK had been imported to site to backfill partially demolished houses, probably in the 1950s. Stand had been treated by ourselves since 2011. No aerial growth since 2013 but lots of viable rhizome discovered at low levels during excavation
16	2015-04-04		75	75m2	7m2	75m2	5	5m. Traveled along a phone duct	1.8	1.8m	A large development site on an old car breakers yard. 7m strip of JK on the bank of a ditch, next to and growing under a concrete slab. Slab had promoted horizontal spread. No previous control of JK. JK was to be removed completely as part of contract.
17	2015-03-10		72	72m2	~100m2	1.5m	1	~1m	1.2	1.2m	Area of JK displaying characteristics of previous years growth on a site being prepared for residential development.
18	2016-02-17		0.25	0.5 x 0.5 m	3 x 4 m	0.7m	3	3m	0.6	0.6m	Very mature >3m in height, Stem 25mm thick. Large crown, main rhizome 60mm diameter thickness. Rhizome spread along boundary walls and into drain, distance at least 3m
18	2016-03-04		4	4m2	9m2	1m	2	2m	0.7	0.7	Residential garden, mature stand Height 2.5m, 25mm thick, 20 canes, growing behind/under shed area. spread restricted by concrete path/foundations
18	2016-03-22		4	4m x 1	4m x 2m	0.7m	1	1m	0.7	0.7m	Residential garden, mature stands 2m, 20mm, x10 canes, previously herbicide treated
18	2016-03-23		4	2 x 2m	2 x 2m	2 x 5 m	3	3m	0.9	<1m	Verge are behind commercial offices, next to boundary wall. Mature stands >2m high, 25mm thick, rhizome running along wall boundary
19	2016-02-16		5	5 square metres	60 cubic metres	2m	3	3m	2	up to 2m	a mature area of knotweed towards the edge of the site, pretty much untouched for years.
19	2016-01-12		30	30 square metres	170 cubic metres	2.1 m	4	3-4 metres	2.1	2.1m	A larger mature area of knotweed growing close to an old hedge line, previously treated using roundup.
19	2016-01-04		2	2 square metres	35 cubic metres	2m	2	2m	2	2m	a small area of previously treated knotweed growing amongst dense native vegetation.
19	2105-12-15		60	60 square metres	350 cubic metres	2.5m	4	4m	2.5	2.5m	a large mature stand of knotweed
19	2016-12-02		1	1 square metre	1 square metre	14 cubic metres	2	2m	1.5	1.5m	a small area of knotweed in a rear garden
20	2016-02-11		56	8 metres by 7 metres	13 metres by 11 metres	2 metres	2	2 metres	1.7	1.7 metres	The JK was approximately 5-6 years old, the site was a construction site with on going development works. The JK was growing in rows, area had areas of concrete slabs and a tarred road. Rhizomes where found underneath the concrete and tarred road.
20	2015-06-10		2.48	3.1 metres by 0.8 metres	11.5 metres by 3.1 metres	1.2 metres	1	1 metre	0.7	0.7 metres	The JK was approximately 3-4 years old. Running along a boundary fence line in the garden of a residential property. JK rhizomes were contained near the surface due to concrete from the fence.
20	2014-11-11		2	4 metres by 0.5 metres	8 metres by 2 metres	1.5 metres	1	1 metre	1	1 metre	The JK was approximately 1-2 years old. Small plants found beside a telegraph pole and a BT manhole. The site was an open space area on the boundary of a residential site.
21	2016-01-14		7	7 mr2	3 cubic metres	1m	2	2m	2	200cm	There were 2 stands in raised soil sitting on an old weed blanket membrane and well hardcored base.
22	2014-07-01		4	4m2	70m2	1.5m	3.5	3.5m	1	1.0m	Highways site, adjacent to a small lane and with woodland on the other side. JKW stand was no particularly vigorous.
22	2014-05-02		2	2m2	70m2	2m	4	4m	1.5	1.5m	domestic site
23	2016-02-15		64	40 +88	75 +108	1.7m	3	3m	1.7	1.7 max	40 m on steep bank 3 large crowns interlinked below ground 88 m on flat ground 5-6 crowns Old chapel
23	2016-02-04		12	12m	18m	1.2m	2	2m	1.2	1.2	Very well established against farmhouse known to block light from window 50 years ago knotweed only extended 2 m from window when dug this month
23	2016-02-01		224	48+400	70+520	2m	1.5	1.5m	2	2m	Well established stands in soft landscape area on side of factory yard area
23	2016-01-18		12.7143	35+4+40+1+6+2+1	55+8+56+2+9+4+2	1.6	1	1m	1.5	1.5	Knotweed growing from piles of material on derelict site estimated to have been undisturbed for circa 10 years
23	2016-11-06		42	42+30+88+120+6+75	As above	56+52+120+180+8+110	2	2	1.5	1.5	Very well established knotweed on development site, some areas had soil piles over and had then grown through piled soil
27	no date provided		30	30			1.5	1.5	1.5	1.5
27	no date provided		88	88			1	1	1.2	1.2
27	no date provided		120	120			2	2	2	2
27	no date provided		6	6			1.5	1.5	1.5	1.5
27	no date provided		75	75			2.5	2.5	2.5	2.5
24	2015-11-05		150	150 square meters	Approximately 300 square meters	2.5 meters	2	2 meters	2.2	2-2.2 meters	Very mature with sporadic outcrops due to badly managed area and poor chemical control. The site had been demolished houses and the JKW had been inadvertently spread whilst the demolition took place
24	2014-11-18		60	60 square meters	180 square meters	3.5 meters	3	3 meters	3.2	3-3.2 meters	Very mature. Old industrial land with many different levels and ground conditions. Ideal for JKW
24	2014-11-18		15	Visible cover, 15 square meters	50 square meters	2.0 meters	4	4 meters	1.5	1.5 meters	Housing demolition site. Semi mature plant. Recent earthworks and services into the houses had encouraged the rhizome to gain entry to the cavity walls via a gas pipe. Fairly shallow rooted, possible due to the sand layer and flood plain of the old coast line at finished depth.
24	2013-04-10		280	280 square meters	887 square meters	3.5 meters	3	Up to 3 meters	3	3 meters	Very Mature JKW with large plants at varied locations throughout the site. Earlier chemical controls by the local authority ineffective. Rhizome still viable. Old housing estate being demolished and the land remediated. Early industrial land.
25	2016-01-01		200	200m2	60m2	<1.8m	1.4	<1.5m within site	1.8	1.8m	River banking with previously treated JK extending within site.Well established crowns present indicative of depth.
25	2016-01-01	Multiple stands	5000	Multiple areas of growth within abandoned development. Total m2 approx 5000m2	Approx 900m2	<2m	1.5	max 3m through tile drain, average 1-1.5m	2	2m	Multiple growths from large well establised to stockpiled and small sporadic growth indicative of historical spread.
25	2016-01-01		2	2m2	2m2	800mm	0.4	400mm	0.6	600mm	Small individual stand indicative of historical spread.
25	2015-12-01		500	500m2	48m2	3m	1.5	Average 1-1.5 although again approx 2.5m through tile drain adjacent property.	2	max 2m then peat	well established boundary jk set within semi mature tree belt. Part treated outwith site boundary.
25	2015-12-01	Multiple stands	3500	3500m2	?	approx 450m2	2	max 2m	2	2m max on banking	Multiple heavy infestations within proposed development area
26	2016-01-12		45	3m x 15m	5m x 17.5m	1.2m	1	approx. 1m all directions	1	1m	established knotweed stand on site boundary of site. Excavated up to site boundary and vertical root barrier installed. JK present in top layer of ash not extending into clay layer beneath
26	2016-01-19		200	20m x 10m	25m x 14m	1.6m	2.5	approx. 2 - 2.5m	1.4	1.4m	Demolished hospital site very overgrown, well established area of JK central to site in location of proposed road. Excavated in full. Rhizome at deepest around foundation of former building structure
26	2016-02-10		20	5m x 4m	7m x 7m	1.9	1.5	1 - 1.5m	1.7	1.7	JK present within ash along side of access track beneath trees. Trees cleared and JK excavated in full down to clay
26	2016-02-10		70	10m x 7m	16m x 11m	1.8	3	2.5 - 3m	1.5	1.5	JK located on grass embankment of site due to be remediated. Rhizome present within top soil and fill material dissipating just above bedrock
26	2016-02-20		150	15m x 10m	15m x 10m as above	20m x 16m	3	2.5 - 3m	1.9	1.9m	JK located within mature trees. Trees cleared to allow for development of site. JK excavated and removed in entirety

## Sheet: PCA contractor survey responses
Was there evidence of defects or structural damage to the residential building caused by the Japanese knotweed?	Was there evidence of defects or structural damage to retaining garden walls, sheds, garages, greenhouses or lightly built garden structures caused by the Japanese knotweed?	Was there evidence of defects or structural damage to drains, sewers and other subterranean services caused by the Japanese knotweed?	Was there evidence of loss of amenity to the garden or grounds resulting from the presence of Japanese knotweed?	How far away from the residential building was the closest visible above ground Japanese knotweed plants?	How far away from the residential building was the closest visible above ground Japanese knotweed plants?	How old was the property?	If you have answered ‘yes’ to any of the questions, please provide additional details below on the severity of the damage.
Response	Response	Response	Response		Open-Ended Response	Open-Ended Response	Open-Ended Response
No	Yes	No	Yes	0	0 metres (growing adjacent to the property)	50 years old	Old utility paving and small retaining wall adjacent to the house were cracked. A stem of Japanese knotweed had grown through a small gap approximately 10 years before. This had grown to form a 30 centimetre wide crown. The property was beginning to show some signs of wear from above ground growth and a build up of debris.
No	Yes	No	Yes	0	0m (small area), larger area in garden	1930s	Small area of JK up against house, pushing up patio and damaging garden wall (both would need replacing). Larger of JK in middle of garden - preventing use or landscaping of area
No	No	No	No	0.5	.5m	100 yrs plus	There appears to be no damage
No	Yes	Yes	Yes	0.9	less than 1 metre	We have seen this 1 year old
No	No	No	No	1	1 metre	100
No	No	No	No	1	1 metre	circa 50 years
No	No	No	No	1	1m	50	n/a
No	No	No	Yes	1	1m	5 years
No	Yes	Yes	Yes	1	1m	1900's	the JKW had grown behind render on a boundary wall, through a crack and through to the other side of the wall.
Yes	Yes	Yes	Yes	1	1m	1960	15k
No	No	No	No	2	2m	15 years	Knotweed small in growth, brought in with top soil for shrub beds
No	No	No	No	2	2 metres	40 years
No	No	No	No	2	2m	10 years	The knotweed was small and not yet established, brought in with the topsoil for a small landscaped area.
No	No	No	Yes	2	2 metres	40 years
No	No	No	Yes	2	2m	20 years old	JK was growing in a soft landscaped area of the garden and starting to dominate.
No	Yes	No	Yes	2	2m	Approximately 30 years	Extensive rhizome network with crowns lifting paving flags and canes exposing cracks in brick built garden walls.
No	No	Yes	Yes	2	2m	60years	slight cracks
No	Yes	Yes	Yes	2	2 metres	70 years	Movement of pavement slabs in garden. Rhizome evident in house drain.
No	No	No	Yes	2.5	2.5m	1960s	Minor loss of visual amenity due to unsightly canes and growth in difficult to reach places - under the trampoline, through fence panels
No	Yes	No	Yes	2.5	2.5 meter	1960 Approx	-lifting brickwork in a retaining wall approx 50cm below the higher ground level and approx180cm above lower ground level. The outbreak traveled mainly behind the retaining wall for approx 5m but also out along a joint in the tarmac parking area for about 2.5m. - Loss of use of the area, the area was avoided. -
No	No	No	No	3	approx 3m	approx 110 years old
No	No	No	Yes	3	3m	Estimate 50 years
No	No	No	No	4	4 m	2000
No	Yes	No	Yes	4	4 m	Approximately 80 yrs	The fencing which was of poor quality had suffered damage from the expanding area of knotweed.
No	No	No	Yes	5	5m	100 yrs	no visible damage to the garden area
No	Yes	No	Yes	5	5M	25YR	LOSS OF AMENITY ONLY
No	Yes	No	Yes	5	5m	1890ish	cracking to base of wall, loose mortar joints, pushing up of paving
No	Yes	Yes	No	6	6m	1980's	cracking to retaining wall in garden
No	No	No	Yes	6	6m	1970	Over shadowing of lawn area by established growth
No	Yes	Yes	Yes	6	6m	100 plus	Jk had populated boundary stone built wall and was well established immediately adjacent to clay outfall. From experience we anticipate rhizome within.
No	No	No	Yes	6.5	6.5 metres	Approx 20 years	Small area of amenity garden is unusable by the resident due to the presence of JK. Minimal severity.
No	No	No	No	7	7M	1930's
No	No	No	Yes	7	7 metres	victorian	A section of garden has been impacted by knotweed and as such could not be fully used. The area of impacted land was thought to be under 10 M2 being less than 10% of the garden.
No	No	No	Yes	8	8 metres	1930's	Loss of garden area.
No	Yes	Yes	Yes	8	8m	60 years	blocked drains and garden wall cracking
No	No	No	No	9	9m	less than 50 years
No	Yes	No	Yes	9	9 metres	1930's	Damage to a garden shed, garden fence and also growing through a paved area
No	No	No	No	10	10m	100 years
No	Yes	No	No	10	10 m	50-100	Dividing wall between properties was beginning to "swell".
No	No	No	No	12	12m	Unknown thought to be over 100 years
No	Yes	No	No	12	12 m	1940's	It was minor. the concrete base to a shed was old and JK I assume under it over 10+ years ago. the concrete had a weakness and the JK has grown up on the outskirts of the concrete base of the shed
No	No	No	No	15	15m	1920s
No	No	No	No	20	20 metres	80 years
No	No	No	No	24	24 metres	60+ years
No	No	No	Yes	30	30 metres	100+ years	some loss and restriction to general gardening use
No	No	No	No	60	60m	1850s
No	No	No	No		2	50
No	No	No
No	No	No
No	No	No
No	Yes	No

## Sheet: RICS surveyor survey responses
Was there evidence of defects or structural damage to the residential building caused by the Japanese knotweed?	Was there evidence of defects or structural damage to retaining garden walls, sheds, garages, greenhouses or lightly built garden structures caused by the Japanese knotweed?	Was there evidence of defects or structural damage to drains, sewers and other subterranean services caused by the Japanese knotweed?	Was there evidence of loss of amenity to the garden or grounds resulting from the presence of Japanese knotweed?	How far away from the residential building was the closest visible above ground Japanese knotweed plants?	How far away from the residential building was the closest visible above ground Japanese knotweed plants?	How old was the property?	If you have answered ‘yes’ to any of the questions, please provide additional details below on the severity of the damage.
Response	Response	Response	Response	Open-Ended Response	Open-Ended Response	Open-Ended Response	Open-Ended Response
Yes	No	No	No	0	0m	50+ years
Yes	No	No	No	0	0m	50+ years	Japanese knotweed growing at the back of the building has started to grow through the wall into the room
No	No	No	No	1	1 metre	1900	The JK was across the while rear garden and within 1 metre at its closest point. However a previous owner had cut it down, disposed of the debris and sold the house without mentioning it in searches etc. As the whole garden was affected (it was coming up through decking, at concrete path edges close to drains) I believe that it had been in the garden for some years. I have also seen a bungalow wh…
No	No	No	No	1	1 metre	125 years
No	No	No	No	1	1m	circa 1985
No	No	No	No	1	1 metre.	1900
Yes	Yes	No	No	1	1 yard	45	Knotweed pushing through concrete and paviors
No	No	No	Yes	1	1m	1990	The small gardens to the rear were overgrown with Knotweed
No	Yes	Yes	Yes	1	1m	25 years	Lifted paving and exploited crack in wall. Suspected in service channel.
No	No	No	No	2	Approx 2m	116 years
No	No	No	No	2	2m	115 years old
No	No	No	No	2	2m	50	n/a
No	No	No	No	3	3 metres from extension	1900 extended 2008
No	No	No	No	3	3 metres	2006
No	No	No	No	3	3 metres	1960's	No damage noted
No	Yes	No	No	3	3m	~50 years old	Rhizome had penetrated weak crumbling mortar joints.
No	Yes	No	No	3	3 mtrs	110 yrs	general deformation to original 1m high boundary wall
No	Yes	No	No	3	3m	1980 construction	Very little but Jk present
No	Yes	No	Yes	3	3m	1950	Limited
No	No	No	No	4	4m	100 years
No	No	No	Yes	4	4 metres	1885	The property had suffered severe structural damage from the close presence of substantial trees, and therefore movement etc was attributed to them
No	No	No	Yes	4	4 metres	1910
No	Yes	No	Yes	4	4m	1930	minor damager to boudary walls but paving slabs dislodged
Yes	Yes	No	Yes	4	4 metres	1890(ish)	Approximately £25000 worth of damage/removal costs
No	Yes	Yes	Yes	4	4m.	1900	Pavings distorted and drains partially blocked.
No	No	No	No	5	5 METRES	1975
No	No	No	No	5	5m away. Valued for reposession in June and by August had grown 1m high from under the decking area.	100 years old
No	No	No	No	5	5m	100 years
No	No	No	Yes	5	5 metres	1900	No apparent damage to property, fences or walls
No	Yes	No	Yes	5	5 meters	1900
No	No	No	No	6	6m	1950's
No	No	No	No	7	7m	1910
No	No	No	No	7	7 m	5 years
No	No	No	No	7	7 metres	150 years
No	Yes	No	No	7	7.0 metres	1950	Minor
No	No	No	No	7.1	7.1m	2008
No	No	No	No	8	8m	1900
No	No	No	No	8	8.0m	80
No	Yes	No	Yes	9	9m	1950s	Damage to wall of garage, mature growth growing through brickwork
No	No	No	No	10	10 metres	110 years
No	No	No	No	10	10m	Victorian	From my experience this defect is overstated
No	No	No	No	10	10m	100 years
No	No	No	No	10	10m	1950,s
No	No	No	No	10	10 metres	30 years
No	No	No	No	10	Approximately 10 metres	Victorian mid terraced house	No apparent damage to the house and little evident damage to any walls or drains.
No	No	No	Yes	10	10 m.	8 years	Just an unsightly invasion in the garden.
No	Yes	No	Yes	10	10m	100 years approx.	Garden wall had cracked and become structurally unsafe, this meant the wall would have to be demolished later in the project.
No	No	No	No	11	11m	c1900	n/a
No	No	No	No	15	15 meters	1900
No	No	No	No	15	15 metres	1750
No	No	No	No	15	15 metres	1960s
No	No	No	No	16	16 metres	1900
No	No	No	No	16	Circa 16m	50 years
No	No	No	No	20	20 metres	35 years
No	No	No	No	20	20m	40 years
No	No	No	No	20	20 metres	1940
No	Yes	No	No	20	20m	100 years
No	No	No	No	22	22m	25 years
No	No	No	No	23	23 metres	8 years
No	No	No	No	25	25m on farm track on adjacent plot.	1960s.
No	No	No	No	30	30m	1950's	N/A
No	No	No	No	50	50m	100	n/a
No	No	No	No	50	50 metres	100 years
No	Yes	No	No	50	50 - 75 metres	circa 1840	Minor damage only to concrete floors on two outbuildings on large country estate. Outbreak being managed on estate by burning. No loss of amenity (44 acres overall)
No	No	No	No	68	75 yards	1970
No	No	No	No		555	45566
No	No	No	No
No	No	No	No
No	No
No	No
No	Yes
