# Supplementary material for: Japanese knotweed (Fallopia japonica): an analysis of capacity to cause structural damage (compared to other plants) and typical rhizome extension
Source: PeerJ. 2018 Jul 25;6:e5246. doi: 10.7717/peerj.5246 (PMC6064201; doi:10.7717/peerj.5246)
Supplement: Supplemental Information 2 — Tab. 1: Damage descriptors and Key for Tab. 2 nomenclature. Tab. 2: Case study damage assessment results. [file peerj-06-5246-s002.xlsx]

## Sheet: Damage descriptors
Data are presented per property from three streets in Northern England.
Street names and house numbers have been removed to retain anonomity
Key:	"blank"	Not associated with damage (e.g. just growing in soil)
	1	correlation with existing dame, e,g, a crack in paving, a gap in brickwork, etc.
	2	minor exacerbation (cosmetic, e.g. crack made wider)
	3	Medium exacerbation (some structural damage, e.g. new cracks form around initial crack or some bricks fallen away)
	4	Major exacerbation (structural damage, beyond cracking, e.g. a wall pushed over or lifted and crack concrete hard standing)
	5	Causing minor damage (cosmetic, e.g. crack made wider)
	6	Causing medium (some structural damage, e.g. new cracks form around initial crack or some bricks fallen away)
	7	Causing major damage (structural damage, beyond cracking, e.g. a wall pushed over or lifted and crack concrete hard standing)
		The worst case from a given property is presented
JK (Japanese knotweed)		Buddlia
immature	non crown	Imature	A whip or less
mature	crown	Mature	clear woodiness

## Sheet: Damage assessment
Property ID	Present	Width	Depth	Size	Mature	Note	JK within 7m	Distant to house	JK based Damage	Distance to boundary wall	JK based Damage	Dist Paving	JK based Damage	Buddlia	Mature	House	Wall	Paving	Tree	House	Wall	Paving	Ivy at distance zero	House	Wall	Paving
House 1	No						Yes	6		3		3.2		Yes	No	0	0		No				No
House 2	No						Yes	5		1.5		1.7		No					No				No
House 3	No						Yes	1.5		1		1.2		Yes	No	0	0		No				No
House 4	No						Yes	5		1		1.2		Yes	No	0	0		No				No
House 5	No						Yes	4.2		1.5		1.7		Yes	No			0	No				No
House 6	No						No							Yes	No	0	0	0	No				No
House 7	No						No							Yes	No	0	0	0	No				No
House 8	No						No							Yes	No	0	0	0	No				No
House 9	No						No							Yes	Yes	0	3	0	No				No
House 10	No						No							Yes	Yes	0	3	0	No				No
House 11	No						No							Yes	No			0	No				No
House 12	No						No							No					No				No
House 13	No						No							Yes	Yes	0	5	0	No				No
House 14	No						No							Yes	Yes	1	1	0	No				No
House 15	No						No							Yes	No	0	0	0	Yes				No
House 16	No						No							Yes	No	0	0	0	No				No
House 17	No						No							Yes	No	0	1	0	No				No
House 18	No						No							Yes	Yes	0	3	1	No				No
House 19	No						No							Yes	Yes	0	3	0	No				No
House 20	No						No							Yes	Yes	0	0	0	No				No
House 21	No						No							Yes	Yes	2	0	0	No				Yes	2	0
House 22	No						No							Yes	No		0	0	No				No
House 23	No						No							No					No				No
House 24	No						No							No					No				No
House 25	No						No							Yes	Yes	0	2	0	No				No
House 26	No						Yes	6		3.5		3.7		Yes	Yes	1	2	0	Yes	1	2	1	No
House 27	Yes	1	1	1	Yes	Several canes	Yes	0.5		0		0	0	Yes	No	0	0	0	Yes	6	2	not visible	No
House 28	Yes	3.4	2.8	9.52	Yes	One large crown in soil with satelite small crowns emerging from soil and cracks in paving	Yes	0		0		0	1	Yes	No	0	0	0	No				No
House 29	Yes	0.1	0.1	0.01	No	Single small plant	Yes	2.3		0		0	0	Yes	No		0	0	No				No
House 30	No						Yes	6		6		6		Yes	Yes	0	1	0	No				No
House 31	No						No							Yes	Yes		2		No				No
House 32	No						No							Yes	No	0	1	0	No				No
House 33	No						No							Yes	No	0	0	0	No				No
House 34	No						No							Yes	No	0	0	0	No				No
House 35	No						No							Yes	Yes	1	2	0	No				No
House 36	No						No							Yes	Yes	0	2	0	No				No
House 37	No						No							Yes	No		1		No				No
House 38	No						No							Yes	No		1		No				No
House 39	Yes	10	5	50	Yes	7 large crowns and many satelite crowns	Yes	0		0	0	0	2	Yes	Yes	0	0	2	Yes				No
House 40	Yes	2	3.5	7	Yes	Several small crowns	Yes	0		0	0	0	0	Yes	Yes		2		No				No
House 41	No						Yes	4.8		4.6		4.8		Yes	Yes	0	2	1	No				No
House 42	No													Yes	Yes		3	0	No				No
House 43	No													Yes	Yes		2		No				No
House 44	No													Yes	Yes	2	2		No				No
House 45	No													Yes	No	0	0	0	No				No
House 46	No													Yes	No			0	No				Yes	2	0
House 47	No													No					Yes		2	2	Yes	0	0
House 48	No													Yes	Yes	0	1	0	No				No
House 49	No													Yes	Yes	0	0	0	No				No
House 50	No													Yes	Yes	0	2	0	No				No
House 51	No													Yes	Yes	1			No				No
House 52	No													Yes	Yes	0	0	0	No				No
House 53	No													Yes	No	0	0	0	No				No
House 54	No													Yes	Yes	0	0	1	No				No
House 55	No						Yes	6.8		4.5		4.7		Yes	No	0	0	0	No				No
House 56	No						Yes	4.2		1.7		1.9		Yes	No	1			No				No
House 57	No						Yes	6.5		5		5.2		Yes	No	0		0	No				Yes
House 58	No													Yes	Yes	0	1	1	No				No
House 59	No													Yes	No			0	No				No
House 60	No													Yes	Yes			1	No				No
House 61	No													Yes	No			0	No				No
House 62	No													Yes	No			0	No				No
House 63	No													No					No				No
House 64	No													Yes	No	0	0	0	Yes		6	6	No
House 65	No													Yes	Yes	0	1	0	No				No
Alley	Yes	2	0.1	0.2	No	Several small plants along base of wall	Yes	n/a		0		0	0	Yes		n/a	3	1	No				No
House 66	No						No							Yes	Yes		2	0	No				No
House 67	No						Yes	5.5		4.5		4.7		Yes	Yes		2	0	No				No
House 68	Yes	3	0.2	0.6	Yes	several small crowns at base of wall	Yes	2.2		0		0	2	Yes	No			0	No				No
